# Supplementary material for: The Role of Cholecystokinin in Peripheral Taste Signaling in Mice
Source: PubMed Central journal article supplement (PMC5671461; doi:10.3389/fphys.2017.00866), 2017-10-31
Supplement: Table1.pdf [file Table1.pdf]

Supplemental Table 1

Two-way ANOVA results for CT and GL nerve responses to various tastants (WT, CCK-Ar<sup>-/-</sup>, CCK-Br<sup>-/-</sup>, vs CCK-Ar<sup>-/-</sup>Br<sup>-/-</sup>)

| tastants         | Effect of genotype |         |          |         |
|------------------|--------------------|---------|----------|---------|
|                  | CT nerve           |         | GL nerve |         |
|                  | DF                 | F       | DF       | F       |
| QHCl             | 3,258              | 38.8*** | 3,192    | 10.5*** |
| Den              | 3,151              | 18.1*** | 3,135    | 7.4***  |
| QSO <sub>4</sub> | 3,146              | 19.9*** | 3,119    | 6.6***  |
| HCl              | 3,260              | 2.3     | 3,142    | 0.4     |
| NaCl             | 3,203              | 1.6     | 3,191    | 1.7     |
| MPG              | 3,184              | 1.2     | 3,162    | 2.3     |
| Suc              | 3,229              | 1.8     | 3,154    | 1.0     |

Table based on data shown in Fig. 5 and supplemental Fig. 1. DF: degree of freedom. F: F values. \*\*\*: P<0.001, ANOVA.
