# Supplementary material for: The Role of Cholecystokinin in Peripheral Taste Signaling in Mice
Source: PubMed Central journal article supplement (PMC5671461; doi:10.3389/fphys.2017.00866), 2017-10-31
Supplement: Table2.pdf [file Table2.pdf]

Supplemental Table 2

One-way ANOVA results for CT nerve responses to various tastants (WT, CCK-Ar<sup>-/-</sup>, CCK-Br<sup>-/-</sup>, vs CCK-Ar<sup>-/-</sup>Br<sup>-/-</sup>)

| tastants          | Effect of genotype |         |
|-------------------|--------------------|---------|
|                   | DF                 | F       |
| QHCl              | 3,46               | 12.2*** |
| Den               | 3,35               | 6.6**   |
| QSO <sub>4</sub>  | 3,38               | 8.5***  |
| HCl               | 3,35               | 0.6     |
| NaCl              | 3,43               | 2.0     |
| MPG               | 3,39               | 0.5     |
| Suc               | 3,41               | 1.1     |
| MgSO <sub>4</sub> | 3,39               | 1.3     |
| TEA               | 3,42               | 2.4     |
| Cyc               | 3,31               | 0.4     |
| Sac               | 3,31               | 1.3     |
| SC                | 3,22               | 0.7     |
| Glc               | 3,21               | 2.0     |
| Frc               | 3,19               | 2.5     |
| Gly               | 3,20               | 2.9     |

Table based on data shown in Fig. 6. DF: degree of freedom. F: F values. \*\*: P<0.01, \*\*\*: P<0.001, ANOVA.
