# Supplementary material for: The Role of Cholecystokinin in Peripheral Taste Signaling in Mice
Source: PubMed Central journal article supplement (PMC5671461; doi:10.3389/fphys.2017.00866), 2017-10-31
Supplement: Table3.pdf [file Table3.pdf]

### Supplemental Table 3

One-way ANOVA results for time dependent changes in CT nerve responses after lorglumide administration

| tastants | Effect of lorglumide |        |
|----------|----------------------|--------|
|          | DF                   | F      |
| QHCl     | 7,47                 | 4.9*** |
| HCl      | 7,40                 | 0.1    |
| NaCl     | 7,40                 | 0.1    |
| MPG      | 7,47                 | 0.5    |
| Suc      | 7,46                 | 0.1    |

The effects of lorglumide were analyzed by owo-way ANOVA. Table based on data shown in Fig. 7. DF: degree of freedom. F: F values. \*\*\*:  $P < 0.001$ , ANOVA.
